# Supplementary material for: Physicochemical properties and their impact on ice nucleation efficiency of respiratory viral RNA and proteins
Source: Royal Society of Chemistry journal article supplement (doi:10.1039/d4em00411f), 2024-01-01
Supplement: d4em00411f1.pdf [file d4em00411f1.pdf]

### Supplementary Information:

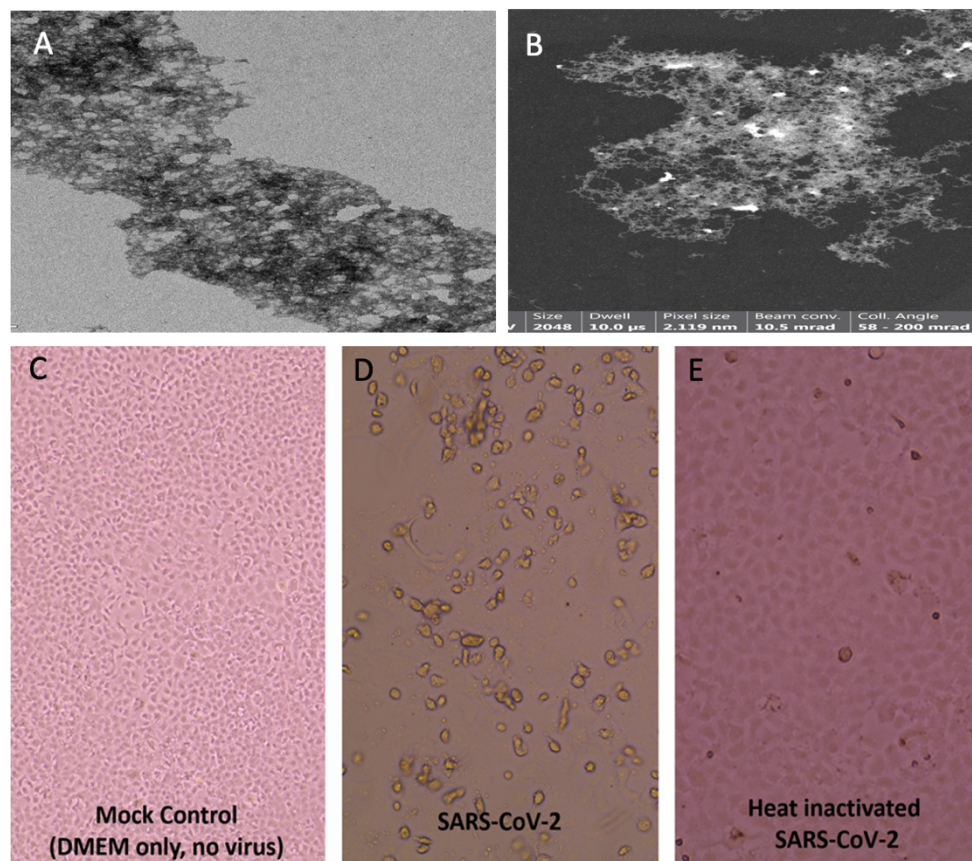

**Figure S1.** A, B) Selected S/TEM images of drops of diluted Bacteriophage MS2 samples analyzed to find the MS2 particles in aggregates. Imaged using Spirit 120 kV TEM and Talos F200X 200 kV TEM respectively. Optical microscopy Images C) Cytopathic effect in Vero E6 cells after inoculation with Mock. D) SARS-CoV-2 virus. E) Heat inactivated SARS-CoV-2, no CPE detected after 7 days indicates no remaining viral activity and samples can then be removed from the BSL3

| Descriptions                                                                                                                                                                                                                                                         |                     | Graphic Summary | Alignments  | Taxonomy    |         |            |          |            |
|----------------------------------------------------------------------------------------------------------------------------------------------------------------------------------------------------------------------------------------------------------------------|---------------------|-----------------|-------------|-------------|---------|------------|----------|------------|
| Sequences producing significant alignments                                                                                                                                                                                                                           |                     |                 |             |             |         |            |          |            |
| Download <span>▼</span> <span>New</span> Select columns <span>▼</span> Show 100 <span>▼</span> <span>?</span>                                                                                                                                                        |                     |                 |             |             |         |            |          |            |
| <input checked="" type="checkbox"/> select all 100 sequences selected <span style="float: right;"> <a href="#">GenBank</a> <a href="#">Graphics</a> <a href="#">Distance tree of results</a> <span style="color: red;">New</span> <a href="#">MSA Viewer</a> </span> |                     |                 |             |             |         |            |          |            |
| Description                                                                                                                                                                                                                                                          | Scientific Name     | Max Score       | Total Score | Query Cover | E value | Per. Ident | Acc. Len | Accession  |
| <input checked="" type="checkbox"/> Severe acute respiratory syndrome coronavirus 2 isolate hCoV-19/Switzerland/VD-CHUV-GEN2511/2020 geno...                                                                                                                         | Severe acute res... | 54983           | 54983       | 99%         | 0.0     | 99.99%     | 29903    | OU267426.1 |
| <input checked="" type="checkbox"/> Severe acute respiratory syndrome coronavirus 2 isolate hCoV-19/Switzerland/VD-CHUV-GEN2967/2020 geno...                                                                                                                         | Severe acute res... | 54983           | 54983       | 99%         | 0.0     | 99.99%     | 29903    | OU267425.1 |
| <input checked="" type="checkbox"/> Severe acute respiratory syndrome coronavirus 2 isolate hCoV-19/Switzerland/VD-CHUV-GEN2958/2020 geno...                                                                                                                         | Severe acute res... | 54983           | 54983       | 99%         | 0.0     | 99.99%     | 29903    | OU267423.1 |
| <input checked="" type="checkbox"/> Severe acute respiratory syndrome coronavirus 2 isolate hCoV-19/Switzerland/VD-CHUV-GEN2978/2020 geno...                                                                                                                         | Severe acute res... | 54983           | 54983       | 99%         | 0.0     | 99.99%     | 29903    | OU267420.1 |
| <input checked="" type="checkbox"/> Severe acute respiratory syndrome coronavirus 2 isolate hCoV-19/Switzerland/VD-CHUV-GEN2528/2020 geno...                                                                                                                         | Severe acute res... | 54983           | 54983       | 99%         | 0.0     | 99.99%     | 29903    | OU267419.1 |
| <input checked="" type="checkbox"/> Severe acute respiratory syndrome coronavirus 2 isolate hCoV-19/Switzerland/VD-CHUV-GEN2472/2020 geno...                                                                                                                         | Severe acute res... | 54983           | 54983       | 99%         | 0.0     | 99.99%     | 29903    | OU267417.1 |
| <input checked="" type="checkbox"/> Severe acute respiratory syndrome coronavirus 2 isolate hCoV-19/Switzerland/VD-CHUV-GEN2484/2020 geno...                                                                                                                         | Severe acute res... | 54983           | 54983       | 99%         | 0.0     | 99.99%     | 29903    | OU267415.1 |
| <input checked="" type="checkbox"/> Severe acute respiratory syndrome coronavirus 2 isolate hCoV-19/Switzerland/VD-CHUV-GEN2512/2020 geno...                                                                                                                         | Severe acute res... | 54983           | 54983       | 99%         | 0.0     | 99.99%     | 29903    | OU267414.1 |
| <input checked="" type="checkbox"/> Severe acute respiratory syndrome coronavirus 2 isolate hCoV-19/Switzerland/VD-CHUV-GEN2478/2020 geno...                                                                                                                         | Severe acute res... | 54983           | 54983       | 99%         | 0.0     | 99.99%     | 29903    | OU267413.1 |
| <input checked="" type="checkbox"/> Severe acute respiratory syndrome coronavirus 2 isolate hCoV-19/Switzerland/VD-CHUV-GEN2488/2020 geno...                                                                                                                         | Severe acute res... | 54983           | 54983       | 99%         | 0.0     | 99.99%     | 29903    | OU267412.1 |
| <input checked="" type="checkbox"/> Severe acute respiratory syndrome coronavirus 2 isolate hCoV-19/Switzerland/VD-CHUV-GEN2479/2020 geno...                                                                                                                         | Severe acute res... | 54983           | 54983       | 99%         | 0.0     | 99.99%     | 29903    | OU267411.1 |
| <input checked="" type="checkbox"/> Severe acute respiratory syndrome coronavirus 2 isolate hCoV-19/Switzerland/VD-CHUV-GEN2521/2020 geno...                                                                                                                         | Severe acute res... | 54983           | 54983       | 99%         | 0.0     | 99.99%     | 29903    | OU267410.1 |
| <input checked="" type="checkbox"/> Severe acute respiratory syndrome coronavirus 2 isolate hCoV-19/Switzerland/VD-CHUV-GEN2517/2020 geno...                                                                                                                         | Severe acute res... | 54983           | 54983       | 99%         | 0.0     | 99.99%     | 29903    | OU267409.1 |
| <input checked="" type="checkbox"/> Severe acute respiratory syndrome coronavirus 2 isolate hCoV-19/Switzerland/VD-CHUV-GEN2476/2020 geno...                                                                                                                         | Severe acute res... | 54983           | 54983       | 99%         | 0.0     | 99.99%     | 29903    | OU267408.1 |
| <input checked="" type="checkbox"/> Severe acute respiratory syndrome coronavirus 2 isolate hCoV-19/Switzerland/VD-CHUV-GEN2487/2020 geno...                                                                                                                         | Severe acute res... | 54983           | 54983       | 99%         | 0.0     | 99.99%     | 29903    | OU267403.1 |
| <input checked="" type="checkbox"/> Severe acute respiratory syndrome coronavirus 2 isolate hCoV-19/Switzerland/VD-CHUV-GEN2471/2020 geno...                                                                                                                         | Severe acute res... | 54983           | 54983       | 99%         | 0.0     | 99.99%     | 29903    | OU267398.1 |
| <input checked="" type="checkbox"/> Severe acute respiratory syndrome coronavirus 2 genome assembly, complete genome: monopartite                                                                                                                                    | Severe acute res... | 54983           | 54983       | 99%         | 0.0     | 99.99%     | 29903    | OA967097.1 |
| <input checked="" type="checkbox"/> Severe acute respiratory syndrome coronavirus 2 genome assembly, complete genome: monopartite                                                                                                                                    | Severe acute res... | 54983           | 54983       | 99%         | 0.0     | 99.99%     | 29903    | OA964362.1 |
| <input checked="" type="checkbox"/> Severe acute respiratory syndrome coronavirus 2 genome assembly, complete genome: monopartite                                                                                                                                    | Severe acute res... | 54983           | 54983       | 99%         | 0.0     | 99.99%     | 29903    | OA964256.1 |
| <input checked="" type="checkbox"/> Severe acute respiratory syndrome coronavirus 2 isolate Switzerland/GE-SNRCL-8301/2020 genome assembly...                                                                                                                        | Severe acute res... | 54983           | 54983       | 99%         | 0.0     | 99.99%     | 29836    | FR993513.1 |
| <input checked="" type="checkbox"/> Severe acute respiratory syndrome coronavirus 2 isolate Switzerland/GE-SNRCL-9138/2020 genome assembly...                                                                                                                        | Severe acute res... | 54983           | 54983       | 99%         | 0.0     | 99.99%     | 29834    | FR993438.1 |

**Figure S2.** BLASTN, using the betacoronavirus genomic database, result of the sequence genome of the SARS-CoV-2 sample. GenBank ID for the sequence is MN908947.3.

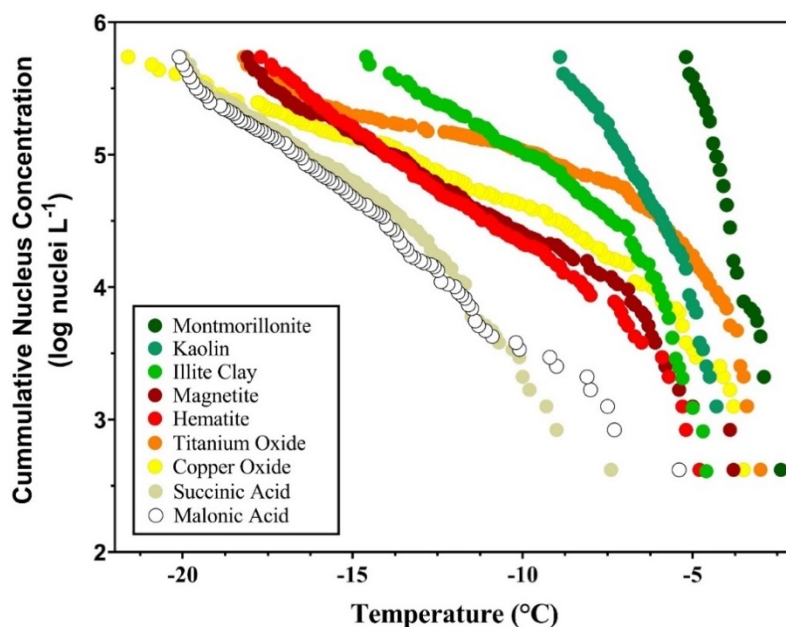

**Figure S3.** Cumulative ice nucleus concentrations for selected airborne contaminants.

**Figure S4.** Cumulative ice nucleus concentrations for TiO<sub>2</sub>, Fe<sub>2</sub>O<sub>3</sub>, and CuO compared to the Milli-Q reference.

**Figure S5.** Distribution of freezing temperatures among different MS2 samples.  
† Centrifuged.

**Figure S6.** Intensity-weighted size distribution vs. particle diameters for MS2 samples at various dilution factors. Data was obtained from the Litesizer particle sizer 500 (Anton Paar).

**Figure S7.** Intensity vs. wavelength of the UVA lamp used in experiments (2 trials).

**Table S1.** Statistical values calculated from freezing points observed during drop freezing experiments of various MS2 Bacteriophage, SARS-CoV-1 and SARS-CoV-2, water samples and solutions containing other common INPs found in air.

| Statistic ( $^{\circ}\text{C}$ )        | Mean  | Median | 1st Percentile | 99th Percentile | Standard Error ( $\sigma/\sqrt{N}$ ) |
|-----------------------------------------|-------|--------|----------------|-----------------|--------------------------------------|
| <b>References/blank</b>                 |       |        |                |                 |                                      |
| Milli-Q Water                           | -20.5 | -21.3  | -22.9          | -16.8           | 0.17                                 |
| <b>Viral RNA</b>                        |       |        |                |                 |                                      |
| MS2 RNA                                 | -13.9 | -14.6  | -19.9          | -4.0            | 0.283                                |
| MS2 RNA + Copper Oxide                  | -11.7 | -11.1  | -21.7          | -5.0            | 0.269                                |
| MS2 RNA + Titanium Oxide                | -12.4 | -11.2  | -19.8          | -3.7            | 0.581                                |
| Influenza RNA                           | -13.7 | -14.1  | -22.2          | -3.9            | 0.285                                |
| SARS-Cov-1 RNA                          | -13.7 | -14.2  | -18.3          | -5.2            | 0.259                                |
| SARS-CoV-1 RNA,<br>Centrifuged          | -16.1 | -17.2  | -18.5          | -6.7            | 0.251                                |
| SARS-Cov-1 RNA, Filtered                | -14.0 | -14.7  | -18.9          | -4.1            | 0.32                                 |
| SARS-CoV-2 RNA                          | -15.9 | -16.5  | -25.3          | -4.5            | 0.415                                |
| SARS CoV-2 RNA,<br>Centrifuged          | -17.6 | -19.3  | -23.5          | -5.6            | 0.377                                |
| SARS CoV-2 RNA, Filtered                | -19.9 | -20.4  | -23.1          | -13.3           | 0.287                                |
| <b>MS2 Bacteriophage</b>                |       |        |                |                 |                                      |
| MS2 100 X                               | -16.5 | -16.9  | -20.1          | -9.61           | 0.3                                  |
| MS2 200 X                               | -18.8 | -19.8  | -21.6          | -7.69           | 0.3                                  |
| MS2 330 X                               | -18.2 | -19.5  | -21.5          | -9.76           | 0.3                                  |
| MS2, UVA                                | -13.3 | -14.9  | -19.1          | -4.3            | 0.366                                |
| MS2, UVB                                | -12.6 | -14.3  | -18.5          | -4.2            | 0.325                                |
| MS2 + Iron (III) Oxide                  | -14.4 | -15.4  | -19.9          | -5.1            | 0.2                                  |
| MS2 + Copper Oxide*                     | -10.7 | -8.1   | -21.5          | -3.9            | 0.522                                |
| MS2 + Titanium Oxide*                   | -12.7 | -13.1  | -19.6          | -4.7            | 0.36                                 |
| <b>SARS CoV-2 and Proteins</b>          |       |        |                |                 |                                      |
| Heat Inactive SARS CoV-2                | -17.6 | -18.4  | -23.1          | -12.5           | 0.18                                 |
| Heat Inactive SARS CoV-2<br>Centrifuged | -18.9 | -19.3  | -24.2          | -8.2            | 0.231                                |
| Heat Inactive SARS CoV-2<br>Filtered    | -16.8 | -17.0  | -21.1          | -10.2           | 0.173                                |
| Anti SARS                               | -16.8 | -17.7  | -22.9          | -6.4            | 0.297                                |
| <b>Other Airborne Materials</b>         |       |        |                |                 |                                      |
| <b>Kaolin*</b>                          | -6.6  | -6.8   | -8.9           | -2.9            | 0.068                                |
| Montmorillonite*                        | -4.2  | -4.2   | -5.2           | -5.1            | 0.03                                 |
| Illite Clay*                            | -9.1  | -8.9   | -14.5          | -5.5            | 0.15                                 |
| Iron (III) oxide*                       | -12.6 | -13.3  | -17.4          | -5.2            | 0.186                                |
| Iron (II, III) oxide*                   | -12.5 | -13.0  | -18.0          | -7.7            | 0.211                                |
| Malonic Acid*                           | -15.6 | -15.9  | -20.0          | -9.5            | 0.171                                |
| Succinic Acid*                          | -15.2 | -15.3  | -19.8          | -3.4            | 0.163                                |
| Titanium (IV) Oxide*                    | -9.1  | -8.1   | -18.0          | -3.8            | 0.264                                |
| Copper (II) Oxide*                      | -12.1 | -12.4  | -20.8          | -3.8            | 0.271                                |
